# Supplementary material for: Dissolved phosphorous through dry–wet–dry transitions in a small-dammed river basin: integrated understanding on transport patterns, export controls, and fate
Source: Royal Society of Chemistry journal article supplement (doi:10.1039/d4em00686k), 2025-01-01
Supplement: d4em00686k1.pdf [file d4em00686k1.pdf]

1

## Supplementary material

2 **Dissolved phosphorous through dry-wet-dry transitions in a small-dammed**  
3 **river basin: integrated understanding on transport patterns, export controls,**  
4 **and fate**

5 H.K.M. Mihiranga<sup>a,b,c</sup>, Yan Jiang<sup>a,b\*</sup>, M.G.S. Sathsarani<sup>a,d</sup>, Xuyong Li<sup>a,b</sup>

6 <sup>a</sup> State Key Laboratory of Urban and Regional Ecology, Research Center for Eco-  
7 Environmental Sciences, Chinese Academy of Sciences, Beijing 100085, China

8 <sup>b</sup> University of Chinese Academy of Sciences, Beijing 100049, China

9 <sup>c</sup> College of Science and Engineering, James Cook University, Cairns, Australia

10 <sup>d</sup> Agronomy Division, Tea Research Institute, Talawakelle, Sri Lanka

11 \* *Corresponding author*, Email: [yanjiang@rcees.ac.cn](mailto:yanjiang@rcees.ac.cn), Tel: +86-35-5296-0024, Fax: +86-10-  
12 6284-9428

13 This document extends for 9 pages consists of 3 figures and 4 tables.

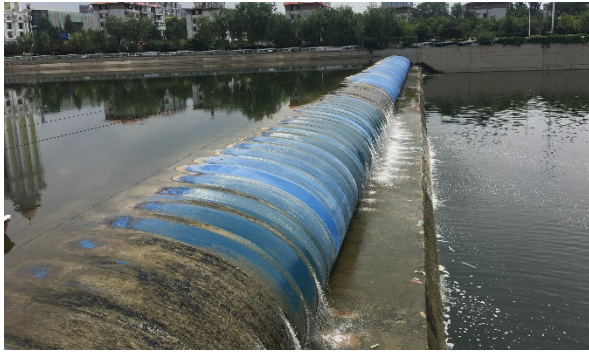

Rubber dam (Lower-reach)

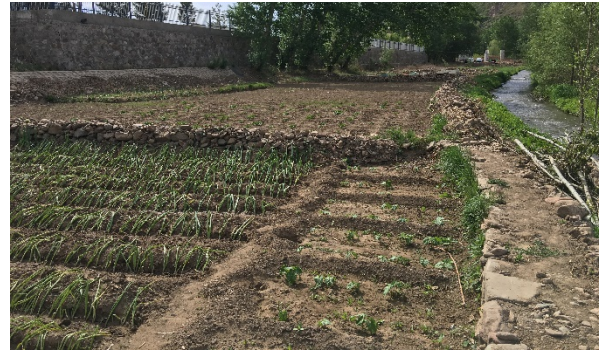

Traditional agriculture (Middle-reach)

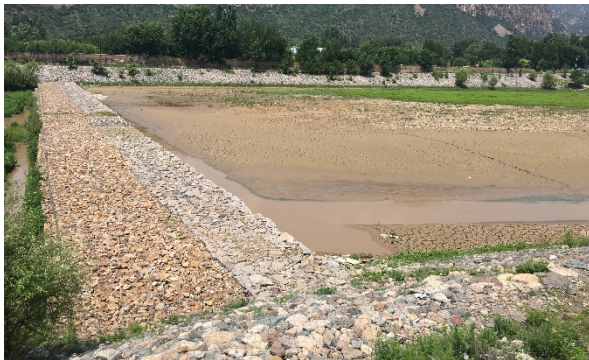

Sand trapping dam (Lower-reach)

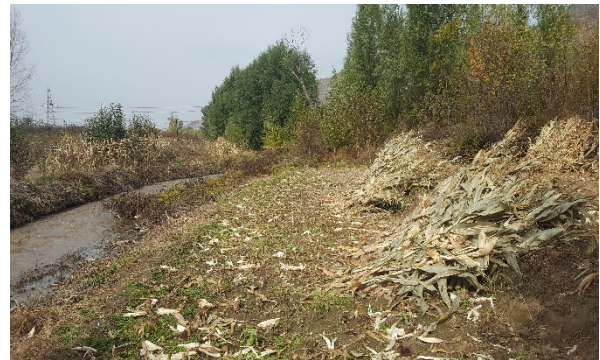

Traditional agriculture (Middle-reach)

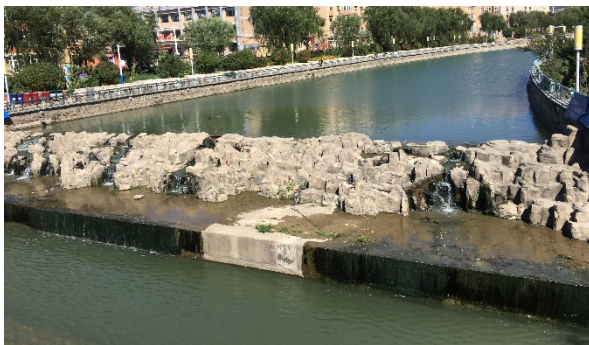

Concrete weirs (Donggou-reach)

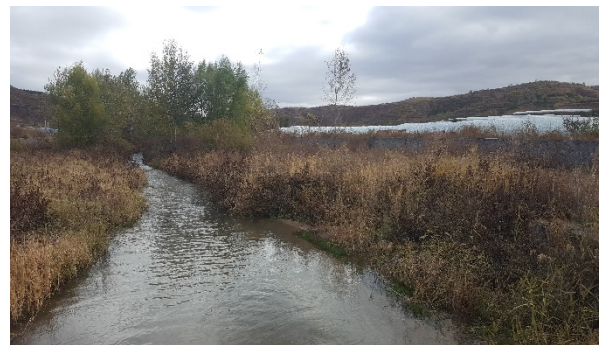

Semi-intensive agriculture (Xigou-reach)

14 **Fig. S1** Images displaying human interactions with the Qingshuihe river system.

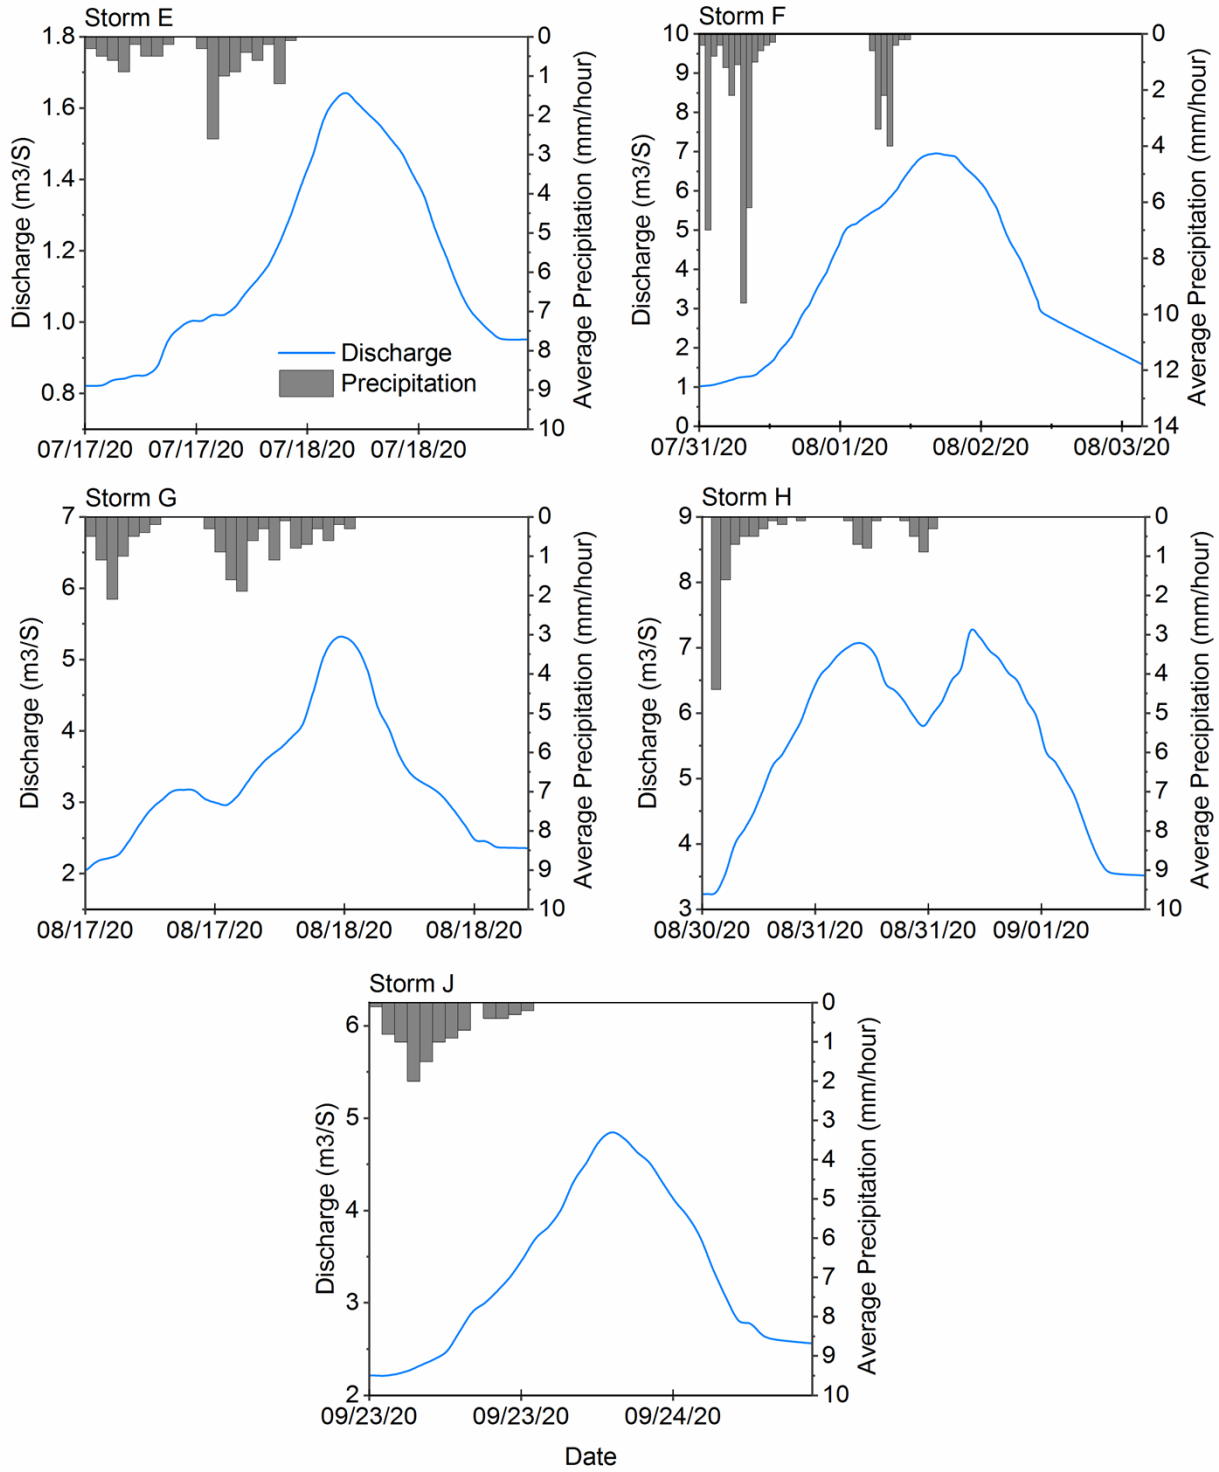

16 **Fig. S2** Plots showing discharge and average hourly precipitation behaviors of the five storm  
 17 events.

18 **Table S1** TP, PP, and TSS concentration-discharge relationships

| Item | Storm event | $HI_m$          | Hysteresis pattern | Actual loop size (mg/L) |
|------|-------------|-----------------|--------------------|-------------------------|
| TP   | E           | -0.210          | Counter-clockwise  | -0.066                  |
|      | F           | 0.359           | Clockwise          | 0.764                   |
|      | G           | 0.146           | Clockwise          | 0.044                   |
|      | H           | NA <sup>a</sup> | Complex            | NA                      |
|      | J           | 0.140           | Clockwise          | 0.031                   |
| PP   | E           | -0.224          | Counter-clockwise  | -0.075                  |
|      | F           | 0.341           | Clockwise          | 0.703                   |
|      | G           | 0.083           | Clockwise          | 0.023                   |
|      | H           | NA              | Complex            | NA                      |
|      | J           | 0.236           | Clockwise          | 0.044                   |
| TSS  | E           | -0.278          | Counter-clockwise  | -53.395                 |
|      | F           | 0.243           | Clockwise          | 434.037                 |
|      | G           | 0.079           | Clockwise          | 11.864                  |
|      | H           | NA              | Clockwise          | NA                      |
|      | J           | 0.105           | Clockwise          | 21.966                  |

19 “NA”: Two discharge peaks and relatively complex concentration behavior in storm H hindered the  
 20 index calculation

21  $HI_m$  values of clockwise PP responses were greater than the corresponding values of TSS in  
 22 each comparison and the trend was reversed when comparing  $HI_m$  values of the counter-  
 23 clockwise patterns of PP and TSS, indicating concentrated PP delivery in rising sedigraph  
 24 limbs compared to falling sedigraph limbs leading to expand the clockwise PP loops and shrink  
 25 counter-clockwise loops compared to TSS.

26 **Table S2** Dry period before the wet season ( $\text{dry}_{(\text{before})}$ ) baseflow data (B1)

| 27 | River reach    | Sub-catchment | TP (mg/L) | TDP (mg/L) | PP (mg/L) | PO4 (mg/L) | DOP (mg/L) | PP/TP | PO4/TP | DOP/TP |
|----|----------------|---------------|-----------|------------|-----------|------------|------------|-------|--------|--------|
| 28 | Lower-reach    | W2            | 0.45      | 0.14       | 0.31      | 0.14       | 0.01       | 0.68  | 0.30   | 0.01   |
| 29 |                | W1            | 0.54      | 0.16       | 0.38      | 0.15       | 0.01       | 0.70  | 0.28   | 0.02   |
| 30 | Xigou-reach    | X6            | 0.09      | 0.05       | 0.04      | 0.02       | 0.02       | 0.49  | 0.26   | 0.25   |
| 31 |                | X5            | 0.11      | 0.04       | 0.07      | 0.02       | 0.01       | 0.67  | 0.22   | 0.11   |
| 32 |                | X4            | 0.08      | 0.03       | 0.04      | 0.02       | 0.01       | 0.58  | 0.26   | 0.16   |
| 33 |                | X3            | 0.06      | 0.03       | 0.03      | 0.02       | <0.01      | 0.53  | 0.42   | 0.05   |
| 34 |                | X2            | 0.16      | 0.04       | 0.12      | 0.01       | 0.03       | 0.74  | 0.07   | 0.19   |
| 35 |                | X1            | 0.06      | 0.02       | 0.03      | 0.02       | 0.01       | 0.61  | 0.28   | 0.11   |
| 36 | Middle-reach   | Y4            | 0.40      | 0.14       | 0.26      | 0.14       | 0.01       | 0.64  | 0.34   | 0.01   |
| 37 |                | Y3            | 0.66      | 0.16       | 0.50      | 0.16       | 0.01       | 0.75  | 0.24   | 0.01   |
| 38 |                | Y2            | 0.70      | 0.22       | 0.47      | 0.21       | 0.01       | 0.68  | 0.30   | 0.01   |
| 39 |                | Y1            | 1.20      | 0.35       | 0.85      | 0.34       | 0.01       | 0.71  | 0.28   | 0.01   |
| 40 | Zhenggou-reach | Z3            | 0.02      | 0.02       | <0.01     | 0.02       | <0.01      | 0.05  | 0.91   | 0.04   |
| 41 |                | Z2            | 0.01      | 0.01       | <0.01     | <0.01      | <0.01      | 0.42  | 0.27   | 0.31   |
| 42 |                | Z1            | 0.05      | 0.03       | 0.02      | 0.02       | 0.01       | 0.38  | 0.46   | 0.15   |
| 43 | Donggou-reach  | D7            | 0.95      | 0.21       | 0.74      | 0.21       | <0.01      | 0.78  | 0.22   | 0.00   |
| 44 |                | D6            | 0.76      | 0.16       | 0.60      | 0.15       | <0.01      | 0.79  | 0.20   | 0.01   |
| 45 |                | D5            | 1.75      | 0.44       | 1.31      | 0.43       | 0.01       | 0.75  | 0.25   | 0.01   |
| 46 |                | D4            | 0.08      | 0.02       | 0.06      | 0.02       | 0.01       | 0.73  | 0.19   | 0.08   |

39 **Table S3** Dry period after the wet season (dry<sub>(after)</sub>) baseflow data (B2)

| River reach    | Sub-catchment | TP<br>(mg/L) | TDP<br>(mg/L) | PP<br>(mg/L) | PO4<br>(mg/L) | DOP<br>(mg/L) | PP/TP | PO4/TP | DOP/TP |
|----------------|---------------|--------------|---------------|--------------|---------------|---------------|-------|--------|--------|
| Lower-reach    | W2            | 0.38         | 0.18          | 0.20         | 0.13          | 0.04          | 0.53  | 0.35   | 0.12   |
|                | W1            | 0.39         | 0.15          | 0.24         | 0.12          | 0.03          | 0.62  | 0.30   | 0.08   |
| Xigou-reach    | X6            | 0.06         | 0.05          | <0.01        | 0.02          | 0.03          | 0.09  | 0.38   | 0.53   |
|                | X5            | 0.07         | 0.06          | 0.01         | 0.03          | 0.03          | 0.10  | 0.38   | 0.52   |
|                | X4            | 0.10         | 0.06          | 0.05         | 0.01          | 0.04          | 0.47  | 0.12   | 0.41   |
|                | X3            | 0.11         | 0.06          | 0.05         | 0.02          | 0.04          | 0.45  | 0.20   | 0.36   |
|                | X2            | 0.07         | 0.06          | 0.01         | 0.03          | 0.03          | 0.14  | 0.36   | 0.50   |
|                | X1            | 0.07         | 0.07          | <0.01        | 0.02          | 0.05          | 0.07  | 0.24   | 0.69   |
| Middle-reach   | Y4            | 0.53         | 0.19          | 0.34         | 0.17          | 0.02          | 0.64  | 0.33   | 0.03   |
|                | Y3            | 0.99         | 0.22          | 0.78         | 0.18          | 0.03          | 0.78  | 0.18   | 0.03   |
|                | Y2            | 0.40         | 0.24          | 0.16         | 0.17          | 0.06          | 0.41  | 0.44   | 0.15   |
|                | Y1            | 0.44         | 0.22          | 0.22         | 0.15          | 0.08          | 0.50  | 0.33   | 0.17   |
| Zhenggou-reach | Z3            | 0.09         | 0.08          | 0.01         | 0.02          | 0.06          | 0.16  | 0.19   | 0.65   |
|                | Z2            | 0.07         | 0.06          | 0.01         | 0.01          | 0.05          | 0.19  | 0.17   | 0.63   |
|                | Z1            | 0.09         | 0.05          | 0.04         | 0.03          | 0.03          | 0.43  | 0.28   | 0.28   |
| Donggou-reach  | D7            | 0.48         | 0.21          | 0.27         | 0.15          | 0.07          | 0.56  | 0.30   | 0.14   |
|                | D6            | 0.91         | 0.23          | 0.68         | 0.20          | 0.02          | 0.75  | 0.23   | 0.02   |
|                | D5            | 0.88         | 0.36          | 0.52         | 0.24          | 0.12          | 0.59  | 0.27   | 0.13   |
|                | D4            | 0.08         | 0.07          | 0.01         | 0.01          | 0.06          | 0.17  | 0.10   | 0.72   |
|                | D3            | 0.09         | 0.07          | 0.01         | 0.03          | 0.05          | 0.13  | 0.30   | 0.58   |
|                | D2            | 0.10         | 0.09          | 0.01         | 0.02          | 0.07          | 0.10  | 0.17   | 0.73   |
|                | D1            | 0.12         | 0.07          | 0.04         | 0.02          | 0.06          | 0.37  | 0.14   | 0.49   |

41 **Table S4** Summary of baseflow P concentration and composition variations between river  
 42 reaches and events

| Baseflow event | River reach    | Feature                 | TP    | PP    | PO4-P | DOP   |
|----------------|----------------|-------------------------|-------|-------|-------|-------|
| B1             | Lower-reach    | Max-con.                | 0.536 | 0.377 | 0.151 | 0.008 |
|                |                | Min-con.                | 0.453 | 0.310 | 0.138 | 0.005 |
|                |                | Average-con.            | 0.494 | 0.343 | 0.144 | 0.007 |
|                |                | Averaged fraction of TP |       | 69%   | 29%   | 1%    |
|                | Xigou-reach    | Max-con.                | 0.159 | 0.117 | 0.024 | 0.030 |
|                |                | Min-con.                | 0.056 | 0.029 | 0.011 | 0.003 |
|                |                | Average-con.            | 0.091 | 0.057 | 0.020 | 0.014 |
|                |                | Averaged fraction of TP |       | 60%   | 25%   | 14%   |
|                | Middle-reach   | Max-con.                | 1.197 | 0.847 | 0.339 | 0.011 |
|                |                | Min-con.                | 0.403 | 0.259 | 0.138 | 0.005 |
|                |                | Average-con.            | 0.740 | 0.520 | 0.212 | 0.008 |
|                |                | Averaged fraction of TP |       | 70%   | 29%   | 1%    |
|                | Zhenggou-reach | Max-con.                | 0.051 | 0.020 | 0.024 | 0.008 |
|                |                | Min-con.                | 0.012 | 0.001 | 0.003 | 0.001 |
|                |                | Average-con.            | 0.027 | 0.008 | 0.014 | 0.004 |
|                |                | Averaged fraction of TP |       | 28%   | 55%   | 17%   |
|                | Donggou-reach  | Max-con.                | 1.750 | 1.307 | 0.433 | 0.010 |
|                |                | Min-con.                | 0.080 | 0.059 | 0.016 | 0.004 |
|                |                | Average-con.            | 0.886 | 0.677 | 0.203 | 0.006 |
|                |                | Averaged fraction of TP |       | 76%   | 22%   | 2%    |
| B2             | Lower-reach    | Max-con.                | 0.386 | 0.238 | 0.133 | 0.044 |
|                |                | Min-con.                | 0.376 | 0.199 | 0.116 | 0.032 |
|                |                | Average-con.            | 0.381 | 0.219 | 0.124 | 0.038 |
|                |                | Averaged fraction of TP |       | 57%   | 33%   | 10%   |
|                | Xigou-reach    | Max-con.                | 0.109 | 0.049 | 0.025 | 0.048 |
|                |                | Min-con.                | 0.055 | 0.005 | 0.013 | 0.029 |
|                |                | Average-con.            | 0.079 | 0.021 | 0.021 | 0.038 |
|                |                | Averaged fraction of TP |       | 22%   | 28%   | 50%   |
|                | Middle-reach   | Max-con.                | 0.993 | 0.778 | 0.182 | 0.076 |
|                |                | Min-con.                | 0.396 | 0.160 | 0.145 | 0.017 |
|                |                | Average-con.            | 0.590 | 0.374 | 0.169 | 0.047 |
|                |                | Averaged fraction of TP |       | 58%   | 32%   | 10%   |
|                | Zhenggou-reach | Max-con.                | 0.090 | 0.039 | 0.025 | 0.058 |
|                |                | Min-con.                | 0.075 | 0.014 | 0.013 | 0.025 |
|                |                | Average-con.            | 0.085 | 0.023 | 0.018 | 0.044 |
|                |                | Averaged fraction of TP |       | 26%   | 22%   | 52%   |
|                | Donggou-reach  | Max-con.                | 0.906 | 0.679 | 0.240 | 0.117 |
|                |                | Min-con.                | 0.085 | 0.010 | 0.009 | 0.023 |
|                |                | Average-con.            | 0.378 | 0.221 | 0.094 | 0.064 |

---

|                         |     |     |     |
|-------------------------|-----|-----|-----|
| Averaged fraction of TP | 38% | 22% | 40% |
|-------------------------|-----|-----|-----|

---



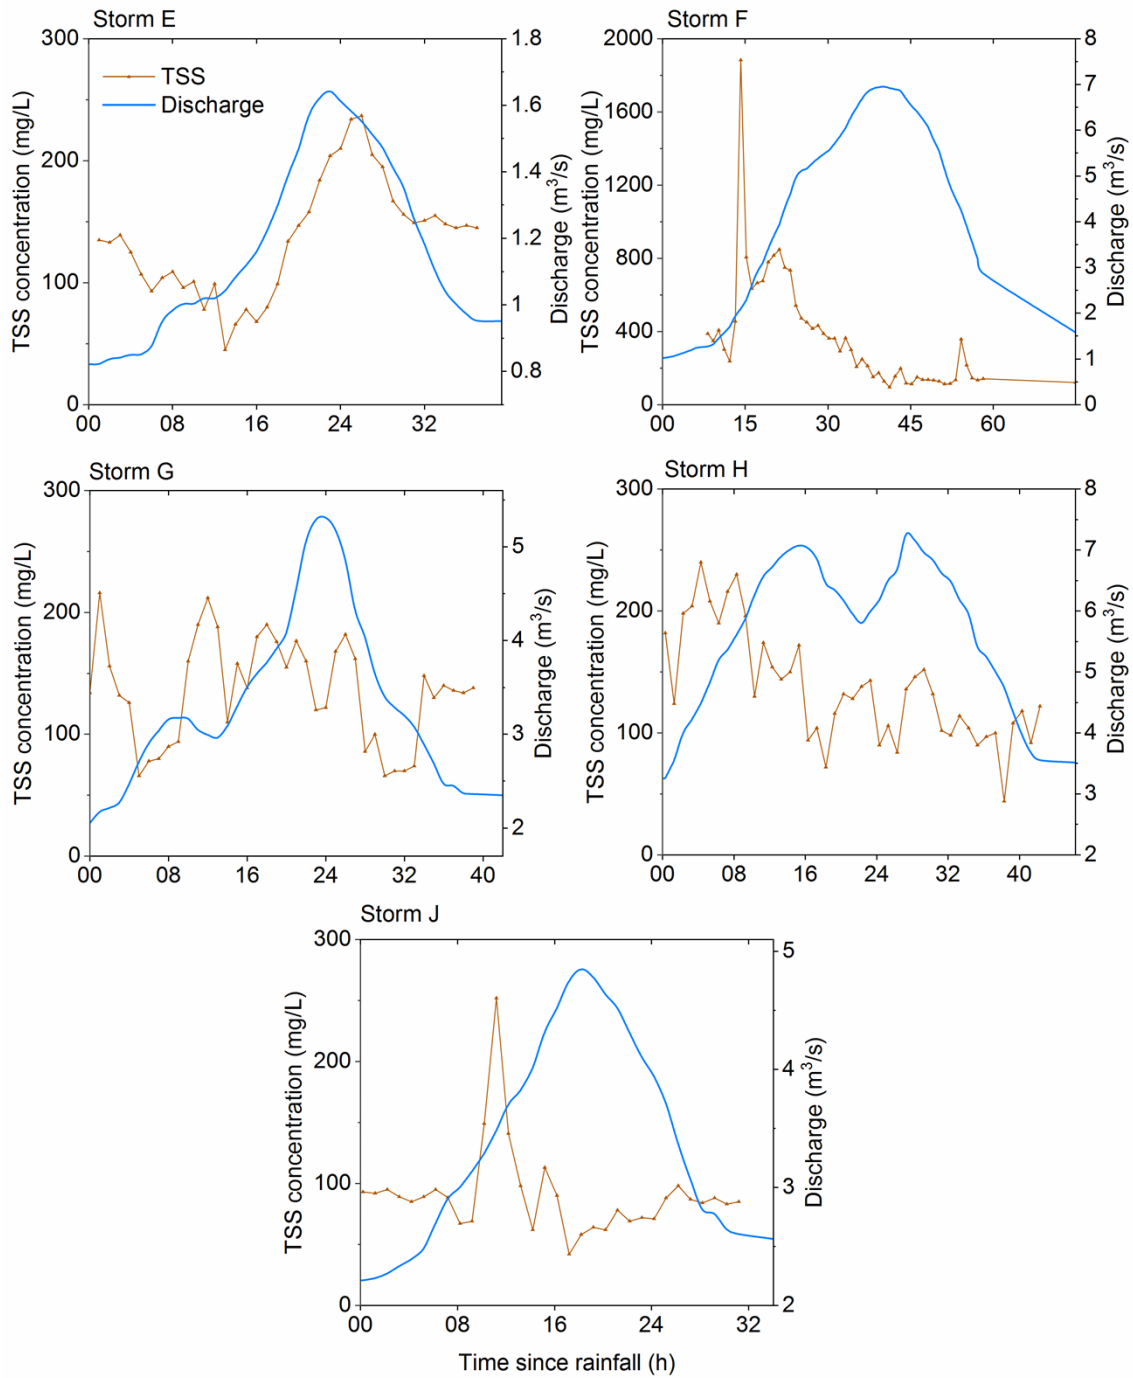

43 **Fig. S3** The figure shows the concentration behavior of TSS during the five storm events.
